# Supplementary material
Source: publisher figshare collection journal article supplement (https://acs.figshare.com/ndownloader/files/13308728)
Supplement: Supplementary file 1 [file 13308728]

## Supporting Information for

### Nonlinear Viscoelasticity of Highly Ordered, Two-Dimensional Assemblies of Metal Nanoparticles Confined at the Air/Water Interface

Shihomi Masuda<sup>1,2,#</sup>, Salomé Mielke<sup>1,#</sup>, Federico Amadei<sup>1</sup>, Akihisa Yamamoto<sup>3</sup>, Pangpang Wang<sup>2</sup>, Takashi Taniguchi<sup>4</sup>, Kenichi Yoshikawa<sup>3,5</sup>, Kaoru Tamada<sup>2,\*</sup>, and Motomu Tanaka<sup>1,3,\*</sup>

<sup>1</sup>Physical Chemistry of Biosystems, Institute of Physical Chemistry, Heidelberg University, D69120 Heidelberg, Germany

<sup>2</sup>Institute for Materials Chemistry and Engineering (IMCE), Kyushu University, 819-0395 Fukuoka, Japan

<sup>3</sup>Center for Integrative Medicine and Physics, Institute for Advanced Study, Kyoto University, 606-8501 Kyoto, Japan

<sup>4</sup>Department of Chemical Engineering, Graduate School of Engineering, Kyoto University, 615-8510 Kyoto, Japan

<sup>5</sup>Faculty of Life and Medical Sciences, Doshisha University, 610-0321 Kyotanabe, Japan

Figure S1: Pressure area isotherms of nanoparticle monolayers.

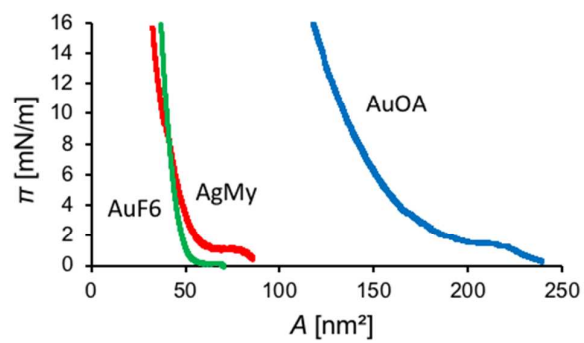

**Figure S1.** Pressure-area isotherms of AuOA, AuF6, AgMy monolayers.
